# Supplementary material
Source: Royal Society of Chemistry journal article supplement (doi:10.1039/d6ja00155f)
Supplement: d6ja00155f1.pdf [file d6ja00155f1.pdf]

## Iodine Quantification in Human Saliva by Inductively Coupled Plasma Mass Spectrometry: A Preliminary Cohort Study

Tanya Mehra<sup>1</sup>, Julia Klorek<sup>1</sup>, Nikolay Solovyev<sup>1\*</sup>

<sup>1</sup> Department of Life Sciences, ATU Sligo, Atlantic Technological University, Ash Lane, Sligo, F91 YW50 Ireland

\* Corresponding author: [nikolay.solovyev@atu.ie](mailto:nikolay.solovyev@atu.ie)

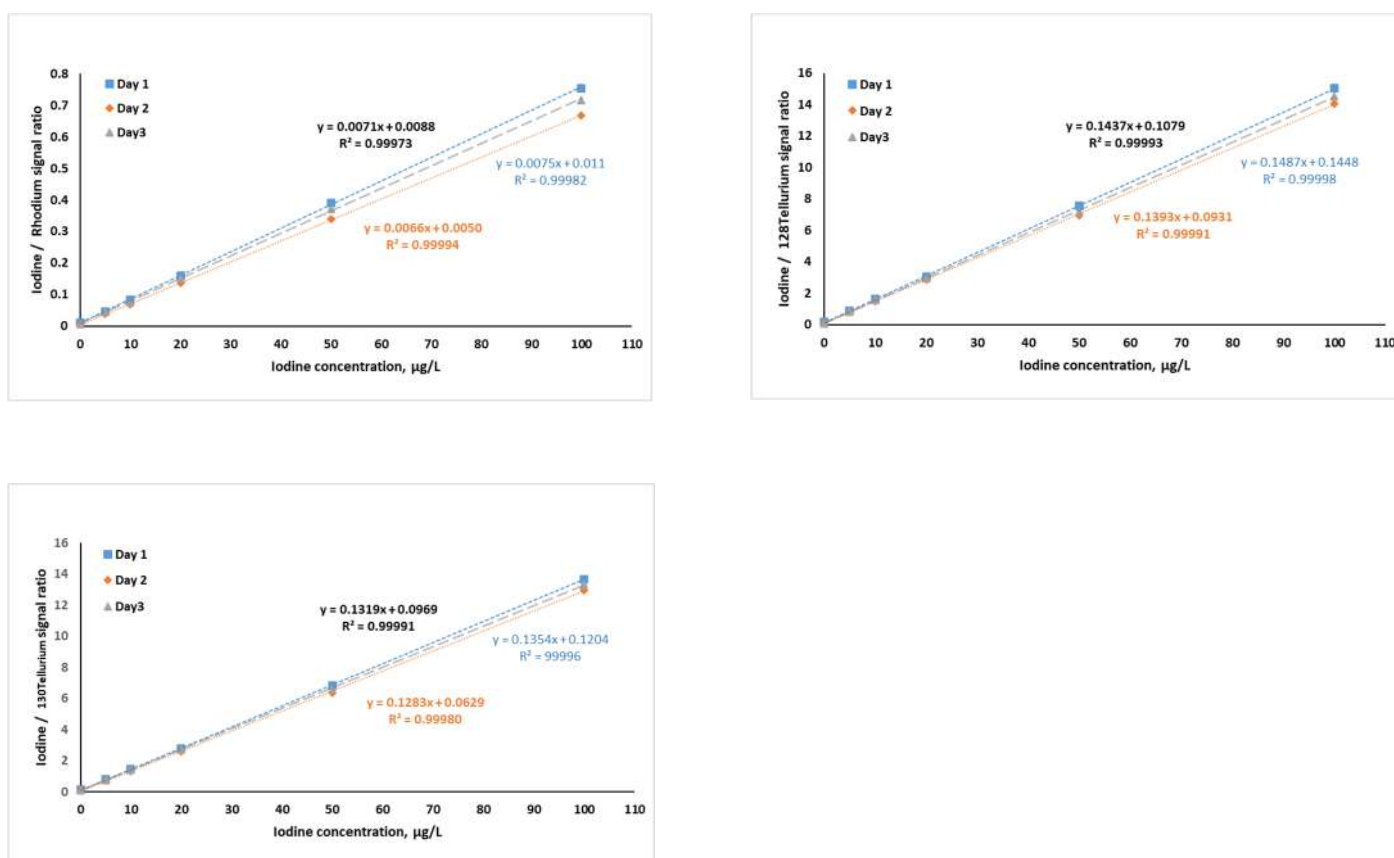

**Figure S1.** Inter-day calibration curves for iodine using three internal standards (<sup>103</sup>Rh, <sup>128</sup>Te and <sup>130</sup>Te). Calibration standards (0–100 µg/L concentration range) were analysed over three independent days (Days 1, 2 and 3). The inter-day precision of calibration curve's slope, expressed as relative standard deviation (RSD), was 6.0%, 3.3% and 2.7% for <sup>103</sup>Rh, <sup>128</sup>Te and <sup>130</sup>Te internal standards, respectively.

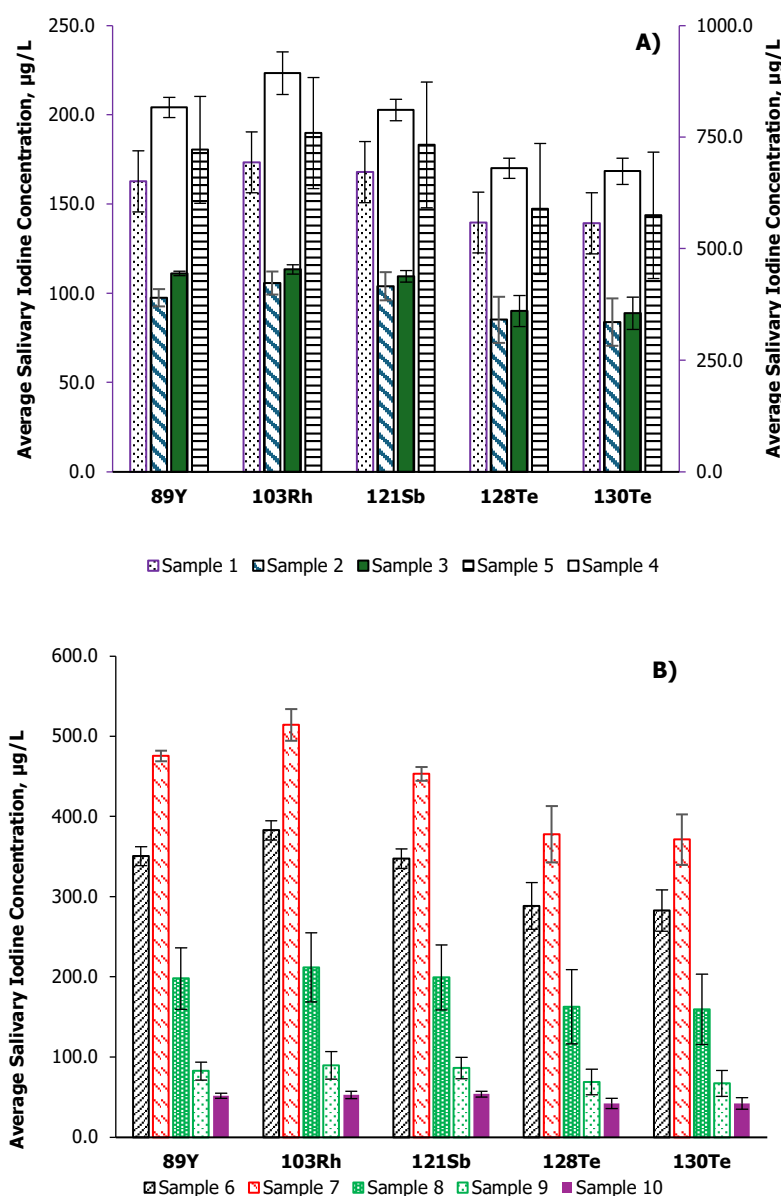

**Figure S2:** Salivary iodine concentration ( $\mu\text{g/L}$ ) was measured in randomly picked samples from the cohort group in two batches (**A** and **B**) over three consecutive days. The graph indicates the 3-day average for each tested internal standard ( $^{89}\text{Y}$ ,  $^{103}\text{Rh}$ ,  $^{121}\text{Sb}$ ,  $^{128}\text{Te}$  and  $^{130}\text{Te}$ ). Error bars represent  $\pm$  standard deviations for intra-day reproducibility testing. For Figure S1 **A** "Sample 4" corresponds to secondary vertical axis due to higher salivary iodine concentration measured.

**Table S1:** Performance metrics of the  $^{103}\text{Rh}$  and  $^{128}\text{Te}$  internal standard candidates (20  $\mu\text{g/L}$ ) for the optimized ICP-MS method with 1% ammonia diluent. The table summarises the average spike recoveries (%) and three-day relative standard deviation (RSD) of the real saliva samples for the cohort group studied ( $n = 20$ ). The data for optimal  $^{130}\text{Te}$  is shown in the main body of the article (Table 3).

| No. | Age | Sex | Smoking Status | $^{103}\text{Rh}$ corrected, 3-day average |              |                                     | $^{128}\text{Te}$ corrected, 3-day average |              |                                     |
|-----|-----|-----|----------------|--------------------------------------------|--------------|-------------------------------------|--------------------------------------------|--------------|-------------------------------------|
|     |     |     |                | Salivary iodine, $\mu\text{g/L}$           | 3-day RSD, % | Average ( $n=3$ ) Spike Recovery, % | Salivary iodine, $\mu\text{g/L}$           | 3-day RSD, % | Average ( $n=3$ ) Spike Recovery, % |
| 1   | 20  | M   | NS             | 55.8                                       | 11.3         | 136.3                               | 44.9                                       | 11.9         | 104.0                               |
| 2   | 45  | F   | FS             | 54.9                                       | 6.9          | 141.5                               | 43.7                                       | 4.6          | 101.3                               |
| 3   | 46  | F   | NS             | 228.3                                      | 2.8          | 137.5                               | 179.7                                      | 8.1          | 102.0                               |
| 4   | 47  | M   | NS             | 139.2                                      | 5.0          | 137.5                               | 110.7                                      | 3.1          | 99.2                                |
| 5   | 59  | F   | NS             | 949.6                                      | 5.9          | 166.4                               | 782.4                                      | 14.5         | 100.6                               |
| 6   | 45  | F   | NS             | 170.6                                      | 1.7          | 139.4                               | 135.9                                      | 3.8          | 102.5                               |
| 7   | 42  | F   | NS             | 229.4                                      | 4.0          | 140.7                               | 170.9                                      | 5.8          | 98.4                                |
| 8   | 51  | F   | NS             | 70.3                                       | 13.9         | 135.7                               | 58.6                                       | 2.4          | 99.7                                |
| 9   | N/A | F   | NS             | 21.0                                       | 20.2         | 137.8                               | 18.0                                       | 7.9          | 101.8                               |
| 10  | N/A | N/A | N/A            | 173.0                                      | 7.0          | 140.2                               | 134.7                                      | 5.5          | 100.5                               |
| 11  | 27  | M   | NS             | 173.4                                      | 10.4         | 144.6                               | 139.7                                      | 16.2         | 101.6                               |
| 12  | 27  | F   | NS             | 105.7                                      | 6.1          | 143.4                               | 85.2                                       | 15.2         | 100.5                               |
| 13  | 31  | M   | NS             | 113.4                                      | 2.3          | 139.1                               | 90.1                                       | 9.6          | 99.2                                |
| 14  | 28  | F*  | NS             | 893.6                                      | 5.4          | 148.9                               | 680.5                                      | 3.3          | 96.8                                |
| 15  | 63  | M   | NS             | 189.8                                      | 16.4         | 143.0                               | 147.4                                      | 24.9         | 99.2                                |
| 16  | 58  | M   | NS             | 382.9                                      | 3.1          | 150.4                               | 288.5                                      | 10.1         | 102.1                               |
| 17  | 46  | F   | NS             | 514.2                                      | 3.8          | 155.6                               | 377.9                                      | 9.3          | 101.9                               |
| 18  | N/A | M   | CS             | 211.8                                      | 20.3         | 144.3                               | 162.7                                      | 28.5         | 96.7                                |
| 19  | 20  | F   | NS             | 89.7                                       | 19.1         | 142.8                               | 68.9                                       | 23.2         | 100.8                               |
| 20  | 33  | F   | NS             | 52.8                                       | 8.8          | 143.7                               | 42.3                                       | 15.5         | 101.9                               |

**Footnotes:** F – Female; M – Male; NS – Never smoker; CS – Current smoker; FS – Former smoker; N/A – Data not available (not reported); \* Self-reported pregnancy
